# Supplementary material for: CRISPR loss of function screening to identify genes involved in human primordial germ cell-like cell development
Source: PubMed Central journal article supplement (PMC10752514; doi:10.1371/journal.pgen.1011080), 2023-12-13

# S1 Fig

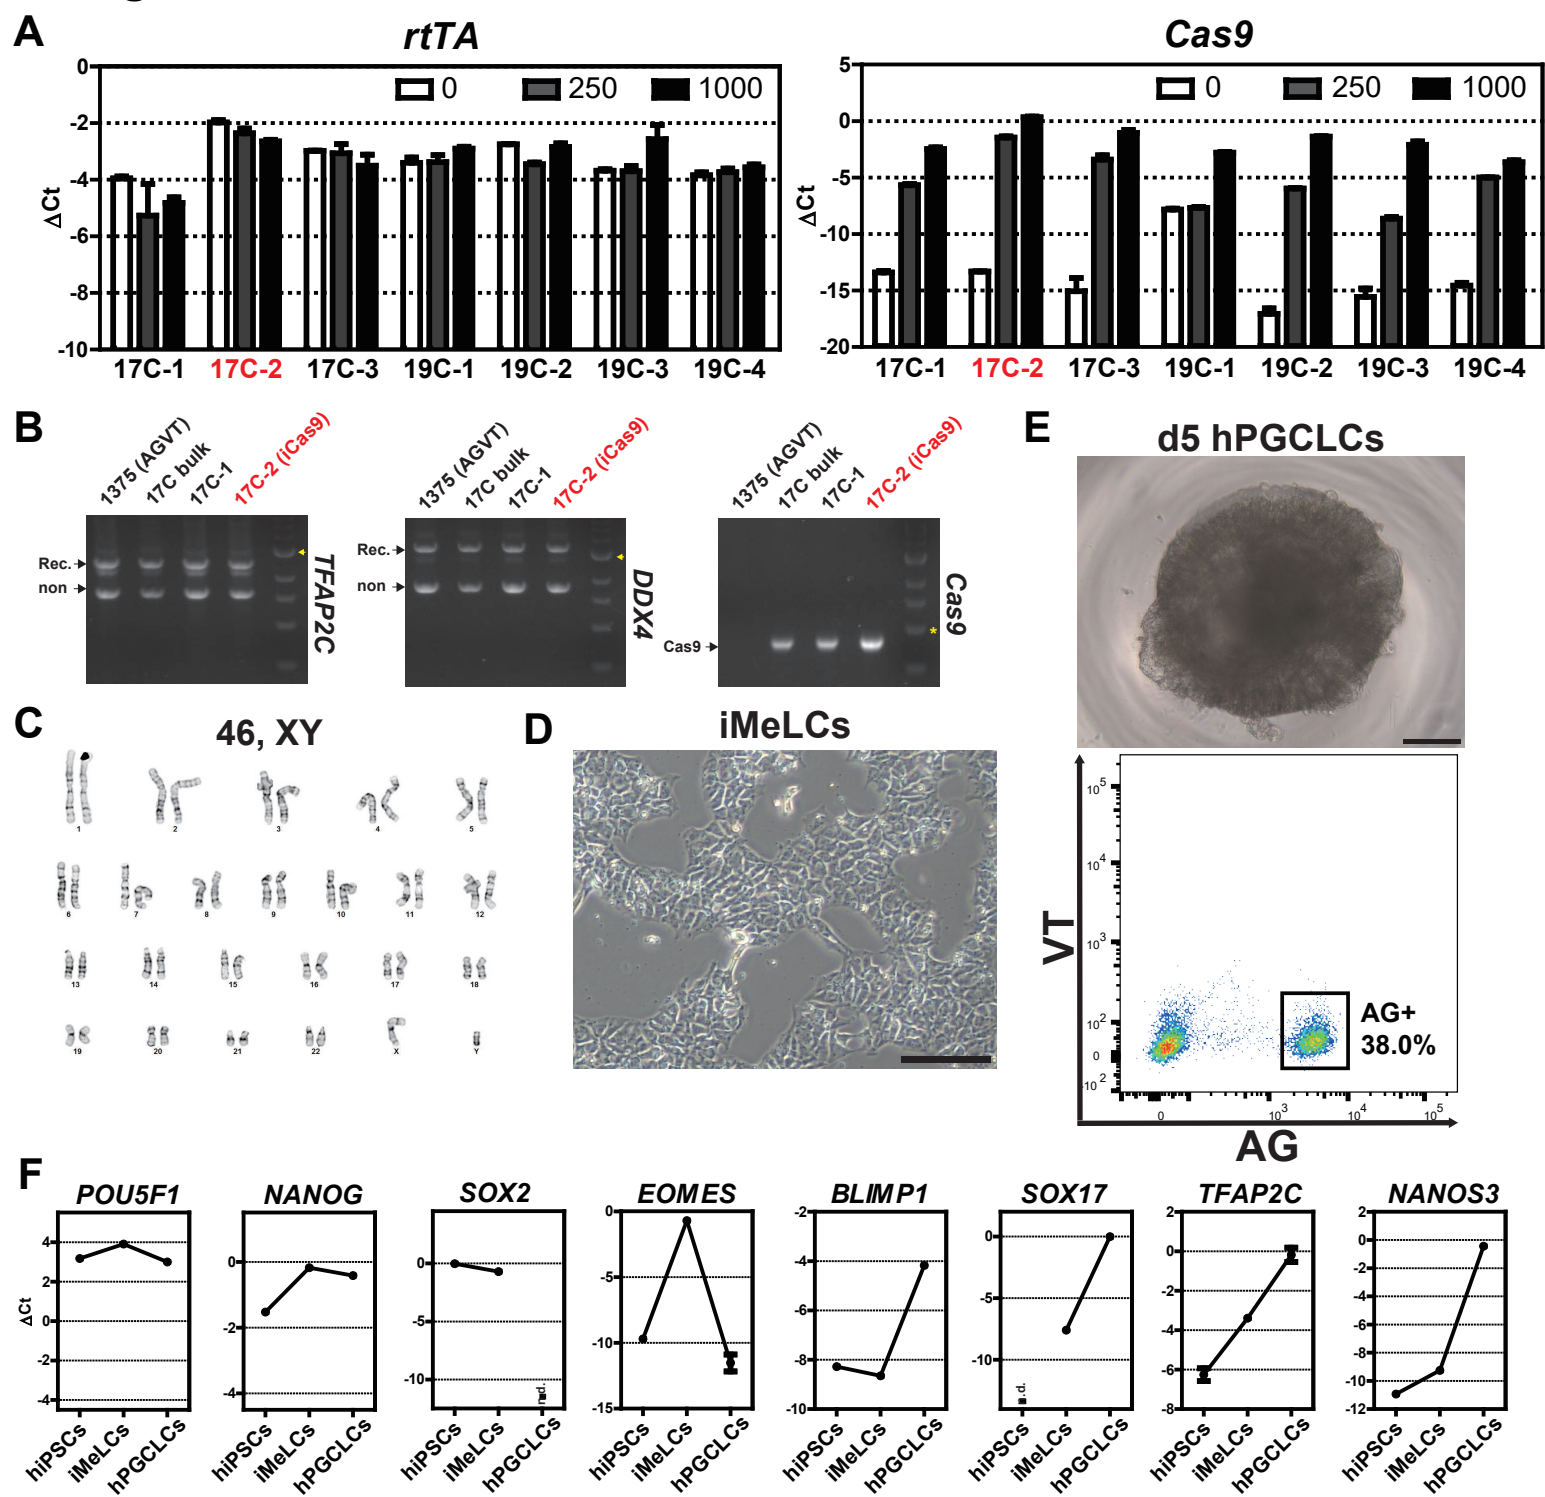

Supplement: pgen.1011080.s001.pdf [file pgen.1011080.s001.pdf]
