# Supplementary material for: CRISPR loss of function screening to identify genes involved in human primordial germ cell-like cell development
Source: PubMed Central journal article supplement (PMC10752514; doi:10.1371/journal.pgen.1011080), 2023-12-13

# S5 Fig

**A**

15-16 wpf human testes

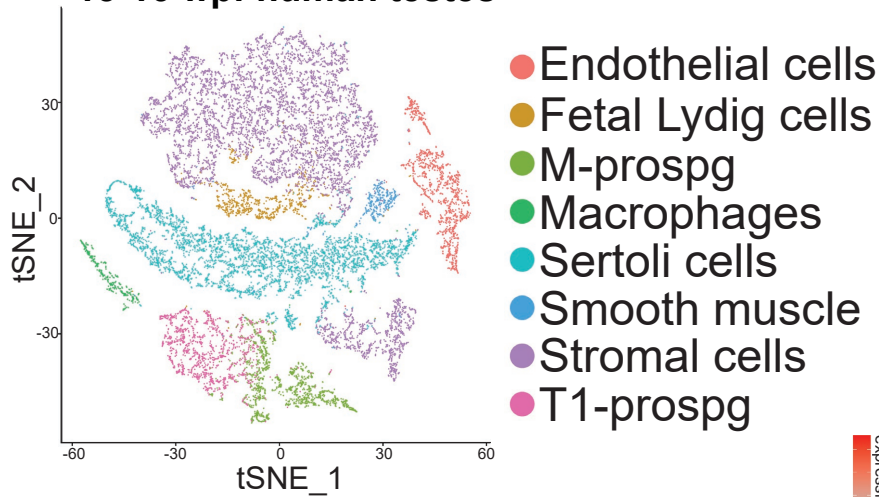

**B**

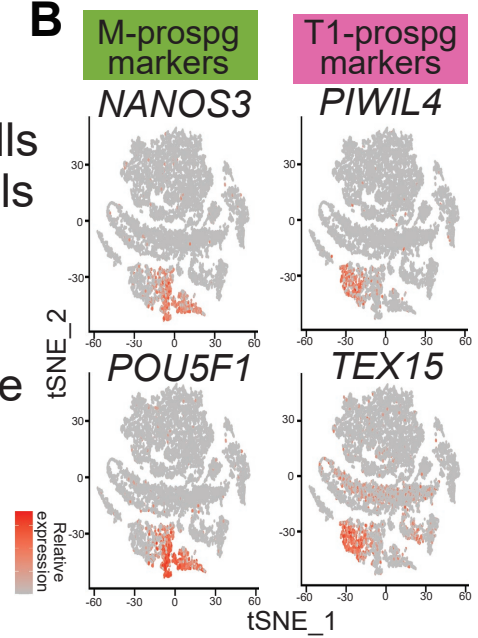

**C**

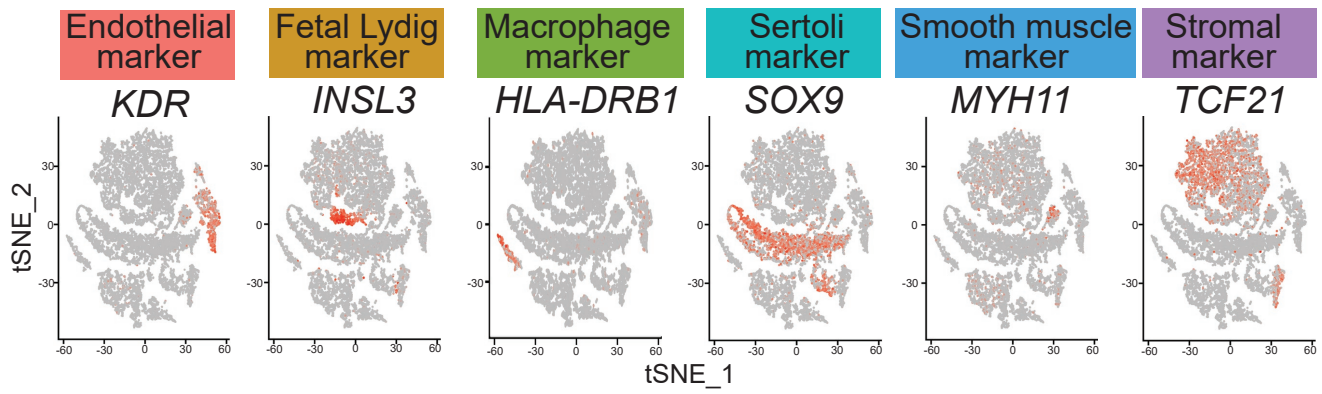

**D**

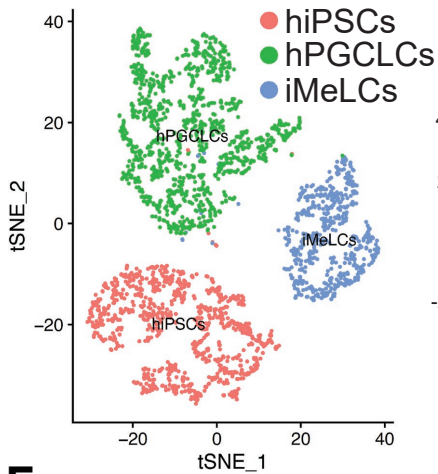

**E**

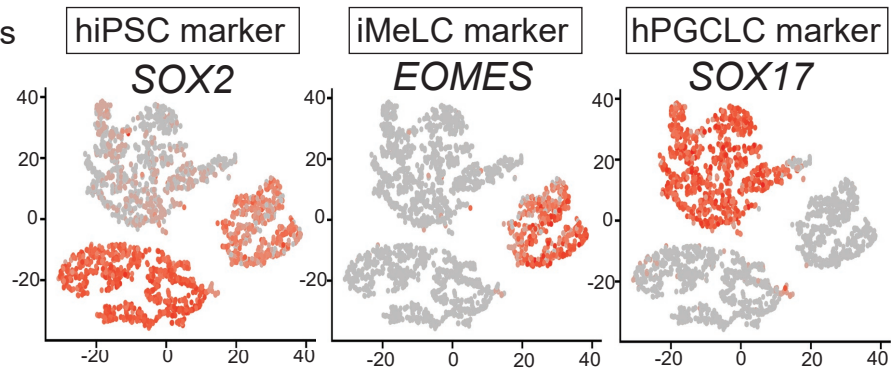

**F**

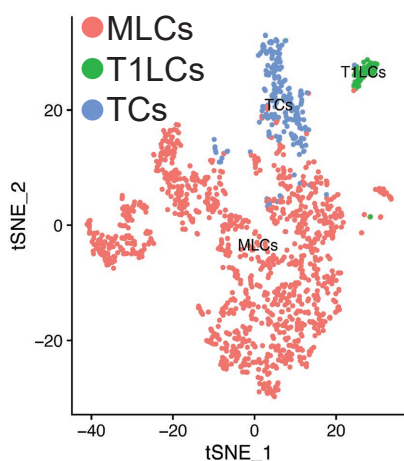

**G**

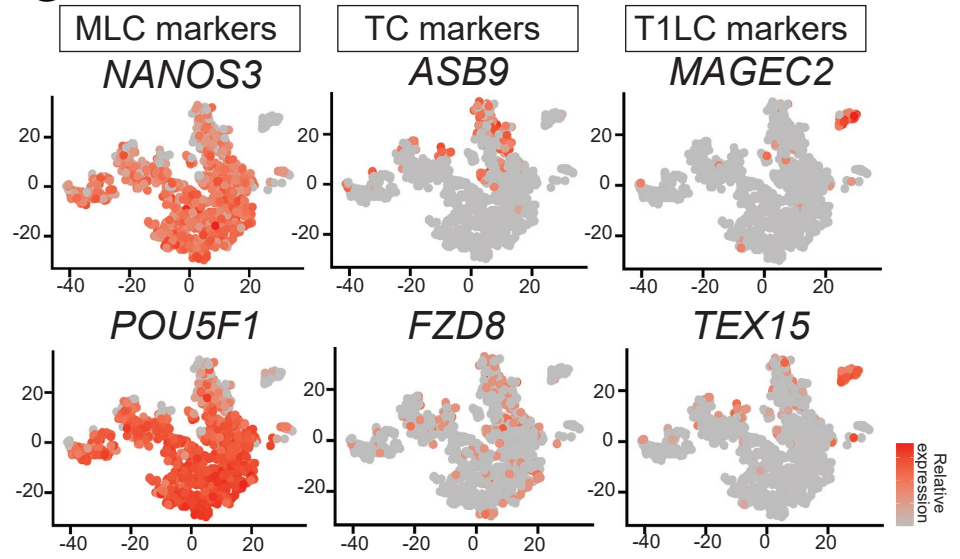

Supplement: pgen.1011080.s005.pdf [file pgen.1011080.s005.pdf]
